1 **Influence of Preservation Methods, Sample Medium and Sampling Time on**  
2 **eDNA Recovery in a Neotropical River**

3  
4 Naiara Guimarães Sales<sup>1</sup>, Owen Simon Wangensteen<sup>2</sup>, Daniel Cardoso Carvalho<sup>3</sup> & Stefano  
5 Mariani<sup>1</sup>

6 <sup>1</sup> Ecosystems & Environment Research Centre, School of Environment & Life Sciences,  
7 University of Salford, UK.

8 <sup>2</sup> Norwegian College of Fishery Science, UiT - The Arctic University of Norway, Tromsø,  
9 Norway.

10 <sup>3</sup> Programa de Pós-graduação em Biologia de Vertebrados, Pontifícia Universidade Católica  
11 de Minas Gerais, Belo Horizonte, Brasil.

12  
13 **Correspondence:**

14 Naiara Guimarães Sales, [n.g.sales@edu.salford.ac.uk](mailto:n.g.sales@edu.salford.ac.uk)

15 Stefano Mariani, [s.mariani@salford.ac.uk](mailto:s.mariani@salford.ac.uk)

16 +44(0) 0161 295 6913

17

18 Running title: eDNA recovery in Neotropical rivers.

19

20 **ABSTRACT**

21 Environmental DNA (eDNA) has rapidly emerged as a promising biodiversity monitoring  
22 technique, proving to be a sensitive and cost-effective method for species detection. Despite the  
23 increasing popularity of eDNA, several questions regarding its limitations remain to be  
24 addressed. We investigated the effect of sampling medium and time, and preservation methods,  
25 on fish detection performance based on eDNA metabarcoding of neotropical freshwater  
26 samples. Water and sediment samples were collected from 11 sites along the Jequitinhonha  
27 River, Southeastern Brazil; sediment samples were stored in ethanol, while the same amounts  
28 of water per sample (3L) were stored in a cool box with ice, as well as by adding the cationic  
29 surfactant Benzalkonium chloride (BAC). Sediment and water samples yielded a similar  
30 amount of fish MOTUs (237 vs 239 in the first sampling event, and 153 vs 142 in the second  
31 sampling event). Water stored in ice provided better results than those preserved in BAC (239  
32 and 142 vs 194 and 71 MOTUs). While documenting the effectiveness of eDNA surveys as  
33 practical tools for fish biodiversity monitoring in poorly accessible areas, we showed that  
34 keeping water samples cooled results in greater eDNA recovery and taxon detection than by  
35 adding cationic surfactants as sample preservatives. Furthermore, by comparing two sets of  
36 samples collected from the same locations at a three-week interval, we highlight the importance  
37 of conducting multiple sampling events when attempting to recover a realistic picture of fish  
38 assemblages in lotic systems.

39

40 **Key-words:** environmental DNA, freshwater, metabarcoding, ichthyofauna, Neotropical.

41

## 42 INTRODUCTION

43 Environmental DNA metabarcoding has been hailed as a promising tool for biodiversity  
44 assessment and monitoring worldwide, in both marine and freshwater ecosystems (Bohmann et  
45 al., 2014; Boussarie et al., 2018; Deiner et al., 2017; Hänfling et al., 2016; Pont et al., 2018;  
46 Thomsen & Willerslev, 2015). This method relies on obtaining the DNA shed by organisms in  
47 the surrounding environment (e.g. water, soil), amplifying it with primers targeting the  
48 taxonomic spectrum of interest, and high-throughput sequencing it to reconstruct community  
49 composition (Bohmann et al., 2014; Handley et al., 2018; Valdez-Moreno et al., 2018; Valentini  
50 et al., 2016).

51 Despite the increased number of publications in the past decade, the application of  
52 eDNA techniques is still not considered straightforward (Taberlet, Bonin, Zinger, & Coissac,  
53 2018). Molecular and bioinformatics protocols continue to be revised and optimized, while  
54 uncertainties remain as to how to streamline and rationalize sampling and sample preservation  
55 (Dickie et al., 2018). The usefulness of eDNA approaches depend on their ability to provide  
56 effective and accurate detection of species, thus requiring a better understanding of the factors  
57 influencing detection rates (Lodge, 2012). Detectability of eDNA in environmental samples is  
58 limited mainly by three processes: i) eDNA production (i.e. rate of DNA shedding), ii)  
59 degradation, iii) removal and transport (Barnes and Turner, 2016; Strickler, Fremier &  
60 Goldberg, 2015). Several factors can affect eDNA production, such as the type of  
61 organism/species (with some species showing a higher eDNA release rate than others -  
62 Maruyama, Nakamura, Yamanaka, Kondoh, & Minamoto, 2014; Sassoubre, Yamahara,  
63 Gardner, Block, & Boehm, 2016), biomass, density and life stage of specimens (Maruyama et  
64 al., 2014; Takahara, Minamoto, Yamanaka, Doi, & Kawabata, 2012), season (Buxton,  
65 Groombridge, Zakaria, & Griffiths, 2017), and water oxygen and temperature which can cause

66 behavioral and physiological changes (e.g. stress) and affect metabolic rates, hence influencing  
67 eDNA production (Maruyama et al., 2014; Pilliod, Goldberg, Arkle, & Waits, 2014). After  
68 eDNA is released in the water it starts to be removed through transport and/or degradation.  
69 eDNA molecules can settle and bind to sediment, and/or be transported by long distances  
70 depending on the type of environment (e.g. lotic, lentic), and thus, degrade and become diluted  
71 during the transport downstream (Strickler et al., 2015).

72 The DNA released in the environment can be degraded at a fast pace, hampering the  
73 identification of rare species and providing false negatives (Barnes et al., 2014; Dejean et al.,  
74 2011; Pilliod et al., 2014; Strickler et al., 2015), which leads to the need for improved  
75 preservation systems that can maximize eDNA recovery (Fonseca, 2018; Hansen, Bekkevold,  
76 Clausen, & Nielsen, 2018). The persistence of DNA in environmental samples can be  
77 influenced by many factors (e.g. temperature, microbial activity, pH, salinity, solar radiation),  
78 and detectability of eDNA in water has been shown to be associated with cold temperatures,  
79 alkaline conditions, and low UV-B levels (Strickler et al., 2015; Tsuji, Ushio, Sakurai,  
80 Minamoto, & Yamanaka, 2017), even though several studies suggest a negligible role of  
81 temperature, UV levels or seasonality on DNA degradation (Andruszkiewicz, Sassoubre, &  
82 Boehm, 2017; Collins et al., 2018; Robson et al., 2016).

83 The most recommended approach to reduce degradation is to extract the DNA as  
84 quickly as possible after sampling. However, due to the constraints of field work conducted in  
85 remote sites located far from laboratory facilities (e.g. difficulties for on-site filtration due to  
86 lack of equipment, and risk of contamination), the filtering process and subsequent DNA  
87 extraction might not be possible or advisable, and a preservation method must be employed in  
88 order to block biological activities and minimize DNA degradation.

89 Different approaches have been tested to preserve water samples before the filtering  
90 process, showing distinct benefits and drawbacks. Storing the samples at low temperatures,  
91 including freezing the samples or cooling using a cool box, are widely employed; however,  
92 these approaches entail equipment requirement increase; whereas the efficiency of cooling the  
93 samples has also been questioned (Eichmiller, Best, & Sorensen, 2016; Pilliod et al., 2014).  
94 Inclusion of buffers, such as EtOH–NaAc (ethanol-sodium acetate) solution, have been reported  
95 to show an eDNA persistence rate similar to samples stored in ice (Ladell, Walleser, McCalla,  
96 Erickson, & Amberg, 2018), however, when sampling larger volumes of water the increased  
97 final volume obtained (i.e. addition of over 2x of solution) might be considered as a problem  
98 during long sampling campaigns. Recently, Yamanaka et al. (2017) tested the addition of  
99 cationic surfactants as preservatives to suppress DNA degradation at ambient temperatures and  
100 demonstrated the efficiency of Benzalkonium chloride (0.01%) in retaining eDNA  
101 concentration even after 10-day incubation at 21°C. Still, despite being considered as an  
102 effective eDNA preservative, this preservation method was restricted to a species specific  
103 eDNA recovery test and the effectiveness of the cationic surfactant in preserving eDNA  
104 samples for metabarcoding analysis has not yet been evaluated.

105 The application of eDNA as a biodiversity assessment tool requires the development,  
106 field validation and optimization of protocols in order to minimize bias and tailor procedures  
107 to the variety of environments and habitats investigated (Taberlet et al., 2018). Furthermore,  
108 the occurrence of a time lag between species presence and sampling event can contribute to  
109 DNA degradation leading to an erroneous inference of species absence (i.e. short time frame  
110 detection due to high degradation rates may hamper the eDNA efficiency in detecting species  
111 where they are present). Sediment samples have shown to contribute to tackling this issue once  
112 DNA attached to sediments can be detected longer than in the water column. In addition,

113 sediment samples can provide a higher concentration and longer persistence of genetic material  
114 for studying past and current species presence, also contributing to understand issues associated  
115 with eDNA transport and removal (Turner, Uy, & Everhart, 2015).

116 Neotropical freshwaters harbor high, and often understudied (Sales, Mariani, Salvador,  
117 Pessali, & Carvalho, 2018), biodiversity and eDNA could assist biodiversity assessment and  
118 monitoring programs, with the ultimate aim to contribute to conservation and management  
119 strategies. Higher temperatures and solar radiation associated with increased turbidity in  
120 tropical waters might contribute to make rivers in the tropics a challenge for eDNA studies due  
121 to possibly higher degradation rates (Barnes et al., 2014; Matheson, Gurney, Esau, & Lehto,  
122 2014; Pilliod et al., 2014). A rapid removal of eDNA (through transport and degradation) might  
123 hamper the detection of species and lead to false negatives (Hansen et al., 2018), compromising  
124 the use of this method for biodiversity assessment and monitoring. In this context, testing  
125 effectiveness of sampling methods is particularly important in remote and tropical locations  
126 (Ladell et al., 2018). Furthermore, the knowledge regarding the use of eDNA in tropical rivers  
127 remains scarce and despite being considered as a promising tool for fish biodiversity assessment  
128 in this region, this approach still requires the optimization of field and laboratory protocols  
129 (Cilleros et al., 2018). To our knowledge no study has been conducted in Neotropical  
130 catchments to evaluate the effect of sampling medium and preservation methods in lotic  
131 environments. Here we obtained water and sediment samples from 11 sites located along the  
132 main stem of River Jequitinhonha (South-Eastern Brazil), and: a) compared two preservation  
133 methods for water samples (cooling the samples using ice and adding the cationic surfactant  
134 Benzalkonium chloride – BAC); b) compared MOTU recovery from water vs sediment  
135 samples, and c) examined the influence of short-term temporal sample replication by sampling  
136 the same locations over a three-week interval.

## 137 MATERIAL AND METHODS

### 138 *Study Site*

139 The Jequitinhonha River Basin, located in Southeast Brazil, flows through two  
140 biodiversity hotspots (Atlantic Forest and Cerrado) encompassing an area of 70,315 km<sup>2</sup> and  
141 running over 1082 km. This region is characterized by tropical climate and environmental  
142 heterogeneity, including semi-arid regions with high temperatures (annual mean of 24.9°C) and  
143 dry period extending over six months per year (Climate-Data, 2018, Bilibio, Hensel, & Selbach,  
144 2011). This catchment, located in one of the poorest and least studied regions of Brazil, is part  
145 of an ecoregion (Coastal Drainages of Eastern Brazil) that harbors considerable fish  
146 biodiversity and one of the highest numbers of endemic and threatened fish species in Brazil  
147 (Machado, Drummond, & Paglia, 2008, Pugedo, Andrade-Neto, Pessali, Birindelli, &  
148 Carvalho, 2016, Rosa & Lima, 2008).

149

### 150 *eDNA sampling and processing*

151 Sediment and water samples were obtained from 11 sample sites, in the Jequitinhonha  
152 River Basin, during two replicated sampling events carried out in January-March 2017 (Figure  
153 1, Table S1 Supporting information). In each sampling event, 6 liters of water were collected  
154 from each sample site (i.e. 3 subsamples of 1 liter each, per treatment) and before the filtering  
155 process the water was preserved using two different methods to compare their efficiency. Upon  
156 collection, one set of samples was stored at low temperatures (using a cooling box with ice),  
157 while in the other batch the cationic surfactant benzalkonium chloride (BAC) was added at a  
158 final concentration of 0.01% (Yamanaka et al. 2017). Water samples were filtered  
159 approximately 8 hours after collection, using Microfil V, 100mL, mixed cellulose esters (MCE)  
160 filters (diameter: 47 mm, pore size: 0.45 µm, Merck Millipore) (Bakker et al. 2017; Deiner et

161 al., 2018) in combination with an automatic vacuum pump. Filters were stored in  
162 microcentrifuge tubes containing silica beads (Bakker et al. 2017). Sediment samples (2  
163 samples/locality) were obtained in the shores, from the superficial layer (approximately 5cm),  
164 and were stored in 50mL centrifuge tubes and preserved in 100% ethanol.

165 DNA extraction from the filters was conducted using the DNeasy PowerWater Kit  
166 (Qiagen) and DNA from the sediments was extracted from 10g of sediment using DNeasy  
167 PowerMax Soil Kit (Qiagen), following the manufacturer's protocol. Purified extracts were  
168 checked for DNA concentration in a Qubit fluorometer (Invitrogen).

169 A contamination control procedure was applied in both field and laboratory works to  
170 avoid the occurrence of contamination. All samples were stored in sterile collection bottles,  
171 disposable gloves were worn at all times, sampling and laboratory equipment and surfaces were  
172 treated with 50% bleach solution for 10 minutes, followed by rinsing in water after each use.  
173 Filtration blanks were run between every sample site, immediately before the next filtration in  
174 order to test for potential contamination during the filtration stage.

175

### 176 ***Amplification, Library preparation and sequencing***

177 The amplification of eDNA metabarcoding markers was conducted using a previously  
178 published fish-specific 12S primer set (Miya et al., 2015). Amplicons of ~172bp from a variable  
179 region of the mitochondrial 12S rRNA gene were obtained with the primers (MiFish-U-F, 5'-  
180 GCCGGTAAACTCGTGCCAGC-3'; MiFish-U-R, 5'-  
181 CATAGTGGGGTATCTAATCCCAGTTTG-3').

182 A total of 183 samples including collection blanks and laboratory negative controls were  
183 sequenced in a single multiplexed Illumina MiSeq run using 2 sets of 96 primers with seven-



184 base sample-specific oligo-tags and a variable number (2-4) of leading Ns (fully degenerate  
185 positions) to increase variability in amplicon sequences. PCR amplification was conducted  
186 using a single-step protocol and to minimize stochasticity in individual reactions, PCRs were  
187 replicated three times for each sample and the products subsequently pooled into single  
188 samples. The PCR reaction consisted of a total volume of 20  $\mu$ L including 10  $\mu$ l Amplitaq; 0.16  
189  $\mu$ l of bovine serum albumin; 1  $\mu$ l of each of the two primers (5  $\mu$ M); 5.84  $\mu$ l of ultra-pure water  
190 and 2  $\mu$ l of DNA template. The PCR profile included an initial denaturing step of 95°C for 10  
191 min, 40 cycles of 95°C for 30s, 60°C for 45s, and 72°C for 30s and a final extension step of  
192 72°C for 5 min. Amplifications were checked through electrophoresis in a 1.5% agarose gel  
193 stained with GelRed (Cambridge Bioscience). PCR products were pooled in two different sets  
194 and purified using MinElute columns (Qiagen), and Illumina libraries were built from each set,  
195 using a NextFlex PCR-free library preparation kit (Bioo Scientific) with unique 6-bp library  
196 tags. A left-sided size selection was performed using 1.1x Agencourt AMPure XP (Beckman  
197 Coulter). Libraries were then quantified by qPCR using a NEBNext qPCR quantification kit  
198 (New England Biolabs) and pooled in equimolar concentrations along with 1% PhiX (v3,  
199 Illumina). The libraries were run at a final molarity of 10pM on an Illumina MiSeq platform in  
200 a single MiSeq flow cell using the 2x 150bp v2 chemistry.

201

## 202 ***Bioinformatics analyses***

203 Bioinformatic analyses were based on the OBITools metabarcoding package (Boyer et  
204 al. 2016). FastQC was used to assess the quality of the reads, paired-end reads were aligned  
205 using illumina-paired-end, and dataset demultiplexing and primer removal were then conducted  
206 using ngsfilter command. A bespoke filter using obigrep was used to select fragments of 140-

207 190bp and remove short fragments originated from library preparation artefacts (primer-dimer,  
208 non-specific amplifications) and reads containing ambiguous bases. Clustering of strictly  
209 identical sequences was performed using obiuniq and a chimera removal step was applied in  
210 vsearch (Rognes, Flouri, Nichols, Quince, & Mahé, 2016) through the uchime-denovo  
211 algorithm (Edgar, Haas, Clemente, Quince, & Knight, 2011). Molecular Operational  
212 Taxonomic Unit (MOTU) delimitation was performed using SWARM 2.0 algorithm (Mahé,  
213 Rognes, Quince, de Vargas, & Duthorn, 2015) with a distance value of  $d=3$  (Siegenthaler et al.,  
214 2018) and ecotag (Boyer et al. 2016) was used for the subsequent taxonomic assignment, with  
215 a custom reference database including all known vertebrate sequences for the sequenced 12S  
216 fragment (Siegenthaler et al., 2018). Ambiguous taxonomic assignments after ecotag were  
217 checked using BLAST against the Genbank nucleotide database.

218 A conservative approach was applied to our analyses to avoid false positives and  
219 exclude MOTUs/reads putatively belonging to sequencing errors or contamination. Reads  
220 detected in the negative controls were removed from all samples, and MOTUs containing less  
221 than 5 reads were excluded from subsequent analyses.

222

### 223 *Statistical analyses*

224 Samples were grouped according to the treatments analyzed (Table 1) and afterwards  
225 all statistical analyses were performed in R v3.5.1 (<https://www.R-project.org/>). Due to  
226 differences in the sequencing depth for each sample, relative read abundances were used for all  
227 statistical analyses (i.e. for each sample the MOTU counts were divided by the total amount of  
228 reads). The vegan package was used to perform the nonparametric method Permutational

229 multivariate analysis of variance (PERMANOVA) (Anderson, 2017), through the ‘adonis’  
230 function (Bray-Curtis dissimilarities, 1000 permutations). Comparisons were performed on  
231 relative abundances calculated for MOTUs in each sample site, per preservation method (BAC  
232 vs ICE), sampling time (1st round vs 2nd round), and per sampling medium (water vs sediment),  
233 to verify the influence of these factors over eDNA recovery. A significance threshold of  $p <$   
234 0.05 was applied at all analyses.

235 Non-metric multidimensional scaling plots were obtained using Bray-Curtis  
236 dissimilarity, through PAST3 software (Hammer, Harper, & Ryan, 2001). ggplot2 and esquisse  
237 packages were used to build ggplot charts in R, and due to an incomplete reference database  
238 and a relatively low taxonomic resolution of the 12S fragment we used the taxonomic  
239 assignment down to family level to compare those methods regarding their performance in  
240 detecting teleost fish communities. Venn diagrams were obtained with BioVenn (Hulsen, Vlieg,  
241 & Alkema, 2008).

242

243

## 244 RESULTS

### 245 *Library quality and raw data*

246 A total of 16,104,492 raw reads were obtained in one Illumina MiSeq run (Library 1:  
247 6,399,823 reads, Library 2: 9,704,669 reads), including 44 sediment samples and 132 water  
248 samples. 10,064,034 reads were kept after initial quality filtering and removal of chimaeras.  
249 After applying a subsequent conservative filtering step (retaining only reads taxonomically  
250 assigned to Actinopterygii, and removal of MOTUs containing less than 5 reads) the number  
251 of reads per sample ranged from 0 (sample 10 – sediment; second sampling event) to 127,250.  
252 The final dataset comprised 311 MOTUs distributed differently in each treatment analyzed  
253 (Figure 2, Table 2).

254

### 255 *Taxonomic assignment*

256 All MOTUs from the sediment samples could be taxonomically assigned at order level  
257 (see Appendix S1, Supporting information) whereas at family level the assignment rate was  
258 96.4% (SED1) and 95.68% (SED2). Regarding the water samples, at order and family levels  
259 the assignment rates were, respectively, 98.97% and 95.88% for BAC1, 97.47% and 93.68%  
260 for BAC2, 100% and 96.83% for ICE1, and 98.72% and 94.17% for ICE2.

261

### 262 *Influence of preservation method, sampling medium, and sampling time*

263 All results of the PERMANOVA analyses (Bray-Curtis,  $p < 0.005$ ), including effect size  
264 ( $R^2$ ) and significance ( $p$ -value) are summarized in Table S2, Supporting information. A  
265 significant difference ( $p < 0.05$ ) in MOTU composition among all the treatments was found and  
266 to verify the influence of preservation methods, sampling medium, and sampling time we  
267 performed pairwise comparisons for all combinations of treatments.

268 The influence of preservation method on MOTU diversity recovery was small (around  
269 2% variance explained) but significant between samples collected during the first sampling  
270 event (BAC1 vs ICE1,  $p=0.016$ ). However, no significant effect was detected for the  
271 preservation methods in the second sampling event (BAC2 vs ICE2,  $p=0.06$ ) (Table S2).

272 Overall and also in all pairwise comparisons, a significant difference between sediment  
273 and water samples was detected. Non-metric multidimensional scaling (nMDS) (Figure 3)  
274 showed a much greater variability among the water samples when compared to the sediment  
275 ones, and a greater separation of samples was apparent for the first sampling event (Figure 3A).  
276 During the second sampling, a higher similarity between sediment and water samples preserved  
277 cooled was found (Figure 3B), and the highest effect size ( $R^2=0.08$ ) was found between SED2  
278 and BAC2 (sediment and water samples preserved in BAC, collected during the second  
279 sampling event).

280 When testing for the effect of sampling event, the community composition differed from  
281 the two events for all treatments analyzed, showing a highest effect size for the sediment  
282 samples ( $R^2=0.07$ ) and a lower effect size for the water samples preserved in BAC ( $R^2=0.04$ ).  
283 A smaller effect was found for preservation method than sampling medium and time. Despite  
284 showing significant differences, overall, the  $R^2$  effect sizes never accounted for any more than  
285 8% of the variance, with a mean around 6%.

286 The Venn diagram overlaps showed a high similarity between the treatments in the first  
287 sampling event with 56.78% of the MOTUs detected in all of them (Figure 4). However, for  
288 the second sampling event a higher dissimilarity was detected when comparing the methods  
289 applied with only 27.55% of the MOTUs recovered being detected in all three methods  
290 (sediment, BAC, ICE).

291

292 ***Community composition across treatments***

293 In total, we detected 7 orders (Characiformes, Cichliformes, Clupeiformes, Cypriniformes,  
294 Cyprinodontiformes, Gymnotiformes, and Siluriformes) and 20 families. Order and family  
295 richness obtained were compared using ggplot charts (Figure 5) and showed a slight difference  
296 across all treatments. As for preservation methods, the relative read abundance (%) was similar  
297 between water samples preserved in BAC and ICE for the first sampling, however, eDNA from  
298 two families of Siluriformes (Callichthyidae and Auchenipteridae) was not recovered from  
299 samples preserved using the cationic surfactant.

300 During the second sampling, the relative read abundance slightly differed between these  
301 two methods with a highest amount of reads from Trichomycteridae (Order Siluriformes) and  
302 also absence of reads from Pimelodidae (Order Siluriformes) in samples with added BAC.  
303 Thus, samples stored in ICE outperformed samples preserved with BAC in both MOTUs  
304 recovery and order/family richness.

305 Regarding the sampling medium, sediment samples provided similar results to water  
306 samples, except in the order Siluiformes, where it outperformed water samples preserved with  
307 BAC by detecting the family Auchenipteridae, and was surpassed by water samples preserved  
308 in ICE in detecting the family Callichthyidae, during the first sampling event. Whereas during  
309 the second sampling, the sediment samples did not recover MOTUs from two orders  
310 (Gymnotiformes and Cypriniformes) but detected one order (Clupeiformes) not identified in  
311 the water samples.

312 In contrast with results obtained for MOTUs recovery, despite showing a lower amount  
313 of MOTUs when compared to samples obtained in the first sampling event, samples obtained  
314 in the second event allowed the detection of additional orders and families. For the sediment  
315 samples, two orders were not detected (Cypriniformes and Gymnotiformes) but one order

316 (Clupeiformes) and one additional family of Siluriformes (Callichthyidae) were only detected  
317 in sediments collected at the second sampling time. Regarding the samples preserved in BAC,  
318 two families of the order Siluriformes were not detected during the second sampling (Claridae  
319 and Pimelodidae) and two additional families of the same order were included (Callichthyidae  
320 and Auchenipteridae), while samples stored in ICE detected one fewer family (Callichthyidae)  
321 when compared to the first sampling.  
322

## 323 DISCUSSION

324 Despite the exponential increase of eDNA publications, most of the studies have been  
325 conducted in temperate regions and in fairly well accessible areas. To date, few studies have  
326 tested the use of eDNA metabarcoding in remote tropical sites, and to our knowledge no study  
327 encompassing freshwater fish biodiversity at a large scale has been performed in Brazil (though  
328 Cilleros et al., 2018 recently published a similar study on fish diversity of French Guiana). Here,  
329 we tested two preservation methods for water samples (cooling the samples vs adding a cationic  
330 surfactant as preservative) and also, we tested the influence of sampling medium (water vs  
331 sediment) and time on eDNA recovery to evaluate the most suitable method and provide a  
332 framework for downstream studies in tropical catchments.

333 Overall, comparisons between preservation methods showed a smaller effect on eDNA  
334 recovery than sampling medium and time (Table S2). Sediment and water samples kept in  
335 cooling boxes outperformed water samples preserved with the cationic surfactant solution (237  
336 and 239 against 194 MOTUs, respectively), while the highest amount of MOTUs was detected  
337 during the first sampling event for all treatments. Most of the variance found resides within the  
338 treatments analyzed, this variance may be due to: i) the distribution of eDNA might be  
339 heterogeneous in rivers showing different spatial structures (Hänfling et al., 2016); ii) eDNA  
340 transport distances may vary between species (Deiner & Altermatt, 2014); iii) natural  
341 differences found in community composition across samples sites, as the structure of freshwater  
342 fish communities are influenced by complex interactions and by heterogeneity of freshwaters  
343 along the river gradient (e.g. geomorphic and hydrologic conditions, microbiota, temperature,  
344 pH, acidity, and chemical composition) (Spurgeon, Pegg, Parasiewicz, & Rogers, 2018). Also,  
345 as shown by Macher and Leese (2018) community composition can change even when



346 sampling the same location in a time frame shorter than one minute and our findings also agree  
347 with earlier authors in that patterns of persistence of eDNA in rivers can be irregular.

348         Despite showing a significant difference, a small effect size was found for comparisons  
349 between preservation methods. The effect of preservation method might be related to the  
350 physical state of DNA molecules in the sample, free DNA can bind to humic substances and  
351 thus, be protected from enzymatic degradation and show a decreased rate on eDNA removal  
352 (Crecchio & Stotzky, 1998). Environmental DNA persistence can also be affected by the  
353 trophic state, showing a higher detectability in dystrophic and eutrophic waters than in  
354 oligotrophic systems (Eichmiller et al., 2016). The Jequitinhonha River is characterized by acid  
355 waters and contains mostly dystrophic and eutrophic soils (Intertechne, 2010) and perhaps, in  
356 this case, low temperatures could better preserve the eDNA molecules on water samples and  
357 might be more important to eDNA preservation than adding the cationic surfactant. However,  
358 degradation rates at complex tropical environments, such as the Jequitinhonha River, have not  
359 been evaluated and the trends for eDNA persistence remain unknown in this realm. A similar  
360 result was found by Laddell et al. (2018), who compared lowering the temperature of samples  
361 to adding EtOH–NaAc, where cooling of the samples outperformed the use of a buffer solution.  
362 It should also be noted that some of the discrepancies between ICE and BAC detections may  
363 simply be due to the reduction of stochasticity afforded by the additional PCRs conducted on  
364 the each water sample (six in total) (Leray & Knowlton, 2017).

365         Thus, despite increasing the equipment need, cooling may be considered as the first  
366 option to decrease DNA degradation in water samples during field collection. Unless no other  
367 option is available, cationic surfactant solutions might not be worthwhile for field sampling in  
368 remote areas due to the difficulties in accessing these specific laboratory reagents and the  
369 significant safety hazard posed by these chemicals (Ladell et al., 2018). However, if neither

370 filtering nor cooling is feasible for a few hours after sampling, the use of some form of  
371 preserving buffer should remain a requirement.

372 Community composition is expected to differ between sampling media, as previous  
373 eDNA studies have found sediment to show a higher DNA concentration and a longer  
374 detectability than surface water (Turner et al., 2015). Since DNA can persist longer when  
375 incorporated into the sediment, temporal inference may be challenging (Turner et al., 2015); on  
376 the other hand, a higher degradation rate and lower detection lag time in aqueous eDNA samples  
377 provide a contemporary snapshot of the biodiversity being assessed (Hansen et al., 2018). Here,  
378 we have found a significant difference ( $p < 0.05$ ) and a higher size effect ( $R^2 = 0.06-0.08$ ) on  
379 MOTU recovery between sediment and water samples (Table 3). Sediment samples  
380 outperformed water samples preserved with BAC by detecting the family Auchenipteridae  
381 (Order Siluriformes), and was surpassed by water samples preserved in ICE in detecting the  
382 family Callichthyidae, during the first sampling event. In the second sampling event, sediment  
383 samples failed to detect the family Callichthyidae and the orders Gymnotiformes and  
384 Cypriniformes, however, the order Clupeiformes was only found using this type of sample, and  
385 19.9% of the MOTUs obtained for the second sampling event was exclusive to this sampling  
386 medium. MOTUs detected only in water samples might indicate the contemporary presence of  
387 those while their absence in sediments samples may be due to a short time frame for those to  
388 settle and bind to the substrate. MOTUs belonging to the order Clupeiformes were detected  
389 only in sample site 11, located at the river mouth and refer to marine species that occasionally  
390 venture into the river to feed (Andrade-Neto, 2010). Although these species might not have  
391 been there at the time of sampling, they might have shed DNA during their incursions and the  
392 eDNA bound to sediment can have persisted longer than the eDNA in the surface water,  
393 contributing to its later detection. Thus, combining sediment and water samples may contribute

394 to obtain a snapshot of the fish community that can distinguish between resident and transient  
395 species.

396 Sampling time influenced MOTU recovery and community composition in all  
397 treatments analyzed, showing a highest effect size in sediment samples and a lowest effect size  
398 in water samples preserved in BAC. An association between the number of MOTUs and effect  
399 size was found, as the higher amount of MOTUs obtained, the higher was also the effect size  
400 of sampling event. Despite showing a lower amount of MOTUs detected, samples obtained in  
401 the second event allowed the detection of additional orders and families. During the second  
402 sampling event 19.9% of the MOTUs were only detected in sediment samples when contrasted  
403 to 2.56% in the first sampling. Sediments can act as eDNA molecules reservoirs, since eDNA  
404 can settle and bind to the substrate and when incorporated its persistence can be much longer  
405 (Eichmiller et al., 2014; Turner et al., 2014).

406 Environmental DNA concentration can change seasonally, as well as changes in  
407 community composition over time should be expected due to natural (e.g. environmental  
408 changes, such as variation in water temperature and flow) or anthropogenic factors (e.g.  
409 pollution, introduction of physical barriers) and this variation has already been documented  
410 through metabarcoding in estuaries (Stoeckle, Soboleva, & Charlop-Powers, 2017), lakes (Bista  
411 et al., 2017) and rivers, even over a small temporal scale (Macher & Leese, 2018). The  
412 Jequitinhonha Valley is a dry region that is under the risk of desertification and by the beginning  
413 of 2017, when the first sampling event was undertaken, it was facing the worst drought in the  
414 past 80 years. However, the sampling was conducted during the rainy season and the average  
415 accumulated rainfall increased from 2.1-50mm (first sampling time) to 100-250 mm (second  
416 sampling event) per month (CPTEC/INPE, 2018). The increase in the precipitation level in this  
417 region, with heavy rainfall causing floods in several sites and this seasonal change might have

418 impacted the MOTU recovery during the second sampling, as the increase in water level can  
419 contribute to dilute the eDNA, change the water temperature and flow, and also cause  
420 fluctuations in community composition. Increased water volume after the rainfall contributes  
421 to a higher velocity and affects eDNA concentrations in water columns, as eDNA molecules  
422 are transported and dispersed towards downstream river (Shogren et al., 2017). Furthermore,  
423 an increase in water flow caused by rainfall might lead to eDNA particles resuspension, which  
424 could explain a higher similarity detected by the nMDS between sampling medium in the  
425 second sampling event.

426           Understanding the effect of abiotic and biotic factors on eDNA recovery in tropical lotic  
427 environments is crucial to improve the interpretation of results and assure the effectiveness of  
428 eDNA as a biodiversity assessment tool. Here, we showed the first results on effect of sampling  
429 medium, time, and preservation methods in lotic environments and our findings suggest that  
430 the interaction between preservation method and MOTU recovery might be less significant than  
431 the influence of sampling medium and sampling event. Cooling the water samples before the  
432 filtering might be a better option in field work conducted in remote areas due to logistical issues  
433 and to an increased eDNA recovery when compared to addition of cationic surfactants as  
434 sample preservatives.

435           We also highlight the importance of a better interpretation of eDNA results when  
436 comparing sediment and water samples due to distinct temporal intervals covered, and  
437 comparing two sets of samples obtained in a short time interval we demonstrate the importance  
438 of applying multiple sampling collections when planning a realistic screening of fish  
439 biodiversity in lotic environments. The recovery of a high amount of MOTUs allowed the  
440 detection of a high degree of fish biodiversity, including changes in community composition,  
441 demonstrating the effectiveness of eDNA as a biodiversity assessment tool in neotropical lotic

442 rivers. However, this study was method-focused and detailed ecological analysis of the  
443 recovered biodiversity is the natural next step. This will require an improved reference database,  
444 as the data obtained here (i.e. potentially hundreds of fish species) suggests that the biodiversity  
445 of this catchment is grossly underestimated (Andrade-Neto, 2010).

446

447

448

#### 449 **ACKNOWLEDGEMENTS**

450 This work was supported by Conselho Nacional de Desenvolvimento Científico e Tecnológico  
451 (CNPq) and Science without Borders Program (Grant #204620/2014-7). We are grateful to  
452 Letícia Sales for the invaluable fieldwork assistance, Charles Baillie for the advice on  
453 bioinformatics analysis, and Gilberto Salvador for his assistance with the maps.

454

#### 455 **DATA ACCESSIBILITY**

456 Data will be made public on the DRYAD repository upon acceptance.

457

458 **REFERENCES**

- 459
- 460 Anderson, M. J. (2017). Permutational Multivariate Analysis of Variance (PERMANOVA).  
461 *Wiley Stat. Ref. Online*, 1–15. doi:10.1002/9781118445112.stat07841.
- 462 Andrade-Neto, F. R. (2010). Estado atual do conhecimento sobre a fauna de peixes da bacia do  
463 Jequitinhonha. *MG Biota*, 2, 23–35.
- 464 Andruszkiewicz, E. A., Sassoubre, L. M., & Boehm, A. B. (2017) Persistence of marine fish  
465 environmental DNA and the influence of sunlight. *PLoS ONE* 12, e0185043.  
466 <https://doi.org/10.1371/journal.pone.0185043>
- 467 Bakker, J., Wangensteen, O. S., Chapman, D. D., Boussarie, G., Buddo, D., Guttridge, T. L.,  
468 Hertler, H., Mouillot, D., Vigliola, L., Mariani, S. (2017) Environmental DNA reveals tropical  
469 shark diversity in contrasting levels of anthropogenic impact. *Scientific Reports* 4(7), 16886.
- 470 Barnes, M. A., Turner, C. R., Jerde, C. L., Renshaw, M. A., Chadderton, W. L., & Lodge, D.  
471 M. (2014). Environmental conditions influence eDNA persistence in aquatic systems.  
472 *Environmental Science and Technology*, 48(3), 1819–1827. <https://doi.org/10.1021/es404734p>
- 473 Barnes, M. A., & Turner, C. R. (2016). The ecology of environmental DNA and implications  
474 for conservation genetics. *Conservation Genetics*, 17(1), 1-17.
- 475 Bilibio, C., Hensel, O., & Selbach, J. (2011). Sustainable water management in the tropics and  
476 subtropics - and case studies in Brazil. V1. Ed: Fundação Universidade Federal do Pampa,  
477 UNIKASSEL, PGCult-UFMA. 358p.
- 478 Bista, I., G. R. Carvalho, K. Walsh, M. Seymour, M. Hajibabaei, D. Lallias, M. Christmas &  
479 S. Creer, 2017. Annual time- series analysis of aqueous eDNA reveals ecologically relevant  
480 dynamics of lake ecosystem biodiversity. *Nature Communications* 8:14087. doi:  
481 10.1038/ncomms14087
- 482 Bohmann, K., Evans, A., Gilbert, M. T. P., Carvalho, G. R., Creer, S., Knap, M., ... Bruyn, M.  
483 (2014). Environmental DNA for wildlife biology and biodiversity monitoring. *Trends in*  
484 *Ecology & Evolution*, 29(6), 358-367. doi: 10.1016/j.tree.2014.04.003
- 485 Boussarie, G., Bakker., J., Wangensteen, O. S., Mariani, S., Bonnin, L., Juhel, J., ... Mouillot,  
486 D. (2018). Environmental DNA illuminates the dark diversity of sharks. *Science Advances*, 4,  
487 1-8.
- 488 Boyer, F., Mercier, C., Bonin, A., Le Bras, Y., Taberlet, P., & Coissac., E. (2016). obitools: A  
489 unix-inspired software package for DNA metabarcoding. *Molecular Ecology Resources*, 16(1),  
490 176–182. doi: 10.1111/1755-0998
- 491 Buxton, A. S., Groombridge, J. J., Zakaria, . B., & Griffiths, R. A. (2017). Seasonal variation  
492 in environmental DNA in relation to population size and environmental factors. *Scientific*  
493 *Reports*, 7, 1-9. doi: 10.1038/srep46294
- 494 Cilleros, K., Valentini, A., Allard, L., Dejean, T., Etienne, R., Grenouillet, G., Iribar, A.,  
495 Taberlet, P., Vigouroux, R., Brosse, S. (2018). Unlocking biodiversity and conservation studies  
496 in high diversity environments using environmental DNA (eDNA): a test with Guianese  
497 freshwater fishes. *Molecular Ecology Resources*, 1–20. doi:10.1111/1755-0998.12900

- 498 Climate data. 2018. Available at: <https://pt.climate-data.org/location/24907/>
- 499 CPTEC (Centro de Previsão de Tempo e Estudos Climáticos), INPE (Instituto Nacional de  
500 Pesquisas Espaciais). (2018). Available at: <http://clima1.cptec.inpe.br/monitoramentobrasil/pt>
- 501 Collins, R. A., Wangenstein, O. S., G'orman, E. J., Mariani, S., Sims, D. S., & Genner, M. J.  
502 (2018). Persistence of environmental DNA in marine systems. *Communications Biology*,  
503 1(185), 1-11. doi: 10.1038/s42003-018-0192-6
- 504 Crecchio, C., & Stotzky, G. (1998). Binding of DNA on humic acids: effect on transformation  
505 of *Bacillus subtilis* and resistance to DNase. *Soil Biology and Biochemistry* 30(8-9), 1061-  
506 1067. doi: 10.1016/S0038-0717(97)00248-4
- 507 Deiner, K., Bik, H. M., Machler, E., Seymour, M., Lacoursiere-Roussel, A., Altermatt, F., ...  
508 Bernatchez, L. (2017). Environmental DNA metabarcoding: Transforming how we survey  
509 animal and plant communities. *Molecular Ecology*, 26, 1-24. doi:10.1111/mec.14350
- 510 Deiner, K., Lopez, J., Bourne, S., Holman, L. E., Seymour, M., Grey, E. K., Lacoursière-  
511 Roussel, A., Li, Y., Renshaw, M. A., Pfrender, M. E., Rius, M., Bernatchez, L., & Lodge, D.  
512 M. (2018). Optimising the detection of marine taxonomic richness using environmental DNA  
513 metabarcoding: the effects of filter material, pore size and extraction method. *Metabarcoding*  
514 & *Metagenomics* 2, 1-15. doi: 10.3897/mbmg.2.28963
- 515 Deiner, K., & Altermatt, F. (2014). Transport distance of invertebrate environmental DNA in  
516 a natural river. *PLoS One*, 9(2). doi: 10.1371/journal.pone.0088786
- 517 Dejean, T., Valentini, A., Duparc, A., Pellier-Cuit, S., Pompanon, F., Taberlet, P., & Miaud,  
518 C. (2011). Persistence of Environmental DNA in Freshwater Ecosystems. *PLoS One*, 6: e23398
- 519 Dickie, I. A., Boyer, S., Buckley, H. L., Duncan, R. P., Gardner, P. P., Hogg, I. D., ... Weaver,  
520 L. (2018). Towards robust and repeatable sampling methods in eDNA-based studies.  
521 *Molecular Ecology Resources*, 18(5), 940-952. doi: 10.1111/1755-0998.12907
- 522 Edgar, R. C., Haas, B. J., Clemente, J. C., Quince, C. & Knight, R. (2011). UCHIME  
523 improves sensitivity and speed of chimera detection. *Bioinformatics* 27, 2194–2200. doi:  
524 10.1093/bioinformatics/btr381
- 525 Eichmiller, J. J., Best, S. E., & Sorensen, P. W. (2016). Effects of temperature and trophic  
526 state on degradation of environmental DNA in lake water. *Environmental Science and*  
527 *Technology*, 50, 1859-1867. doi: 10.1021/acs.est.5b05672
- 528 Fonseca, V. G. (2018). Pitfalls in relative abundance estimation using eDNA metabarcoding.  
529 *Molecular Ecology Resources*, 18(5), 923-926. doi: <https://doi.org/10.1111/1755-0998.12902>
- 530 Hammer, Ø., Harper, D.A.T., & Ryan, P.D. 2001. PAST: Paleontological statistics software  
531 package for education and data analysis. *Palaeontologia Electronica* 4(1). 9pp.
- 532 Handley, L. L., Read, D. S., Winfield, I. J., Kimbell, H., Li, J., Hahn, C., Blackman, R., ...  
533 Hanfling, B. (2018). Temporal and spatial variation in distribution of fish environmental DNA  
534 in England's largest lake. *bioRxiv*. doi: 10.1101/376400



- 535 Hänfling, B., Handley, L. L., Read, D. S., Hahn, C., Li, J., Nichols, P., ... Winfield, I. J. (2016).  
536 Environmental DNA metabarcoding of lake fish communities reflects long-term data from  
537 established survey methods. *Molecular Ecology*, 25(13), 3101–3119. doi: 10.1111/mec.13660
- 538 Hansen, B. K., Bekkevold, D., Clausen L. W., & Nielsen, E. E. (2018). The sceptical  
539 optimist: challenges and perspectives for the application of environmental DNA in marine  
540 fisheries. *Fish and Fisheries*, 2018, 19(5) 751-768. doi: 10.1111/faf.12286
- 541 Hulsen, T., de Vlieg, J., & Alkema, W. (2008). BioVenn - a web application for the comparison  
542 and visualization of biological lists using area-proportional Venn diagrams. *BMC Genomics*,  
543 9(1). doi.org/10.1186/1471-2164-9-488
- 544 Intertechne. (2010). Inventário hidrelétrico dos rios Jequitinhonha e Araçuaí – Relatório final  
545 dos estudos de inventário. Apêndice D, estudos ambientais. 259p.
- 546 Leray, M. & Knowlton, N. (2017). Random sampling causes the low reproducibility of rare  
547 eukaryotic OTUs in Illumina COI metabarcoding. *PeerJ*, 5, e3006.
- 548 Ladell, B. A., Walleser, L. R., McCalla, S. G., Erickson R. A., & Amberg, J. J. (2018). Ethanol  
549 and sodium acetate as a preservation method to delay degradation of environmental DNA.  
550 *Conservation Genetics Resources*, 2-7. doi: 10.1007/s12686-017-0955-2
- 551 Lodge, D. M. (2012). Conservation in a cup of water: estimating biodiversity and abundance  
552 from environmental DNA. *Molecular Ecology*, 21(11), 2555-2558. doi: 10.1111/j.1365-  
553 294X.2012.05600.x.
- 554 Machado, A. B. M., Drummond, G. M., & Paglia, A. P. (2008). Livro vermelho da fauna  
555 brasileira ameaçada de extinção. Belo Horizonte, Fundação Biodiversitas.
- 556 Macher, J., & Leese, F. (2017). Environmental DNA metabarcoding of rivers: Not all DNA is  
557 everywhere, and not all the time. bioRxiv. doi: 10.1101/164046.
- 558 Mahé, F., Rognes, T., Quince, C., de Vargas, C., & Dunthorn, M. (2015). Swarm v2: highly-  
559 scalable and high-resolution amplicon clustering. *PeerJ* 3, e1420.
- 560 Maruyama, A., Nakamura, K., Yamanaka, H., Kondoh, M., & Minamoto, T. (2014). The  
561 release rate of environmental DNA from juvenile and adult fish. *PLoS One*, 9 (12), e114639.  
562 doi:10.1371/ journal.pone.0114639
- 563 Matheson, C. D., Gurney, C., Esau, N., & Lehto, R. (2014). Assessing PCR inhibition from  
564 humic substances. *The Open Enzyme Inhibition Journal*, 3(1), 38–45. doi:  
565 10.2174/1874940201003010038
- 566 Miya, M., Sato, Y., Fukunaga, T., Sado, T., Poulsen, J., Y., Sato, K., ... Iwasaki, W. (2015).  
567 MiFish, a set of universal PCR primers for metabarcoding environmental DNA from fishes:  
568 detection of more than 230 subtropical marine species. *Royal Society Open Science*, 2(7). doi:  
569 10.1098/rsos.150088
- 570 Pilliod, D. S., Goldberg, C. S., Arkle, R. S., & Waits, L. P. (2014). Factors influencing detection  
571 of eDNA from a stream-dwelling amphibian. *Molecular Ecology Resources*, 14(1), 109-116.  
572 doi. 10.1111/1755-0998.12159



- 573 Puggedo, M. L., de Andrade Neto, F. R., Pessali, T. C., Birindelli, J. L. O., & Carvalho, D. C.  
574 (2016). Integrative taxonomy supports new candidate fish species in a poorly studied  
575 neotropical region: the Jequitinhonha River Basin. *Genetica*, *144*(3), 341-349
- 576 Pont, D., Rocle, M., Valentini, A., Civade R., Jean, P., Maire, A., ... Dejean, T. (2018).  
577 Environmental DNA reveals quantitative patterns of fish biodiversity in large rivers despite its  
578 downstream transportation. *Scientific reports*, *8*, 10361. doi: 10.1038/s41598-018-28424-8
- 579 Robson, H. L. A., Noble, T. H., Saunders, R. J., Robson, S. K. A., Burrows, D. W., & Jerry, D.  
580 R. (2016). Fine tuning for the tropics: application of eDNA technology for invasive fish  
581 detection in tropical freshwater ecosystems. *Molecular Ecology Resources* *16*, 922–932.
- 582 Rognes, T., Flouri, T., Nichols, B., Quince, C. & Mahé, F. (2016). VSEARCH: a versatile  
583 open source tool for metagenomics. *PeerJ*, *4*, e2584. doi:10.7717/peerj.2584
- 584 Rosa, R. S. & Lima, F. C. T. (2008). Os peixes ameaçados de extinção. In: Machado, A. B.  
585 M., Drummond, G. M., Paglia, A. P. (eds). Livro vermelho da fauna brasileira ameaçada de  
586 extinção. Ministério do Meio Ambiente/ Fundação Biodiversitas, Brasília, pp9-285.
- 587 Rosa, R. S., & Lima, F. C. T. (2008). Peixes. In: Machado, A. B. M., Drummond, G. M., Paglia,  
588 A. P. (eds) Livro Vermelho da Fauna Brasileira Ameaçada de Extinção, 1st edn. Ministério do  
589 Meio Ambiente, Brasília, pp 9–275
- 590 Sales, N. G., Mariani, S., Salvador, G. N., Pessali, T. C., & Carvalho, D. C. (2018). Hidden  
591 diversity hampers conservation efforts in a highly impacted Neotropical river system. *Frontiers*  
592 *in Genetics*, *9*, 271. doi: 10.3389/fgene.2018.00271
- 593 Sassoubre, L. M., Yamahara, K. M., Gardner, L. D., Block, B. A., Boehm, A. B. (2016).  
594 Quantification of Environmental DNA (eDNA) Shedding and Decay Rates for Three Marine  
595 Fish. *Environmental Science & Technology*, *50*, 10456–10464. doi:10.1021/acs.est.6b03114
- 596 Shogren, A. J., Tank, J. L., Andruszkiewicz, E., Olds, B., Mahon, A. R., Jerde, C. L., &  
597 Bolster, D. (2017). Controls on eDNA movement in streams: transport, retention, and  
598 resuspension. *Scientific Reports*, *7*, 1-11. doi:10.1038/s41598-017-05223-1
- 599 Siegenthaler, A., Wangenstein, O. S., Soto, A. Z., Benvenuto, C., Corrigan, L., & Mariani, S.  
600 (2018). Metabarcoding of shrimp stomach content: harnessing a natural sampler for fish  
601 biodiversity monitoring. *Molecular Ecology Resources*, *8*, in press.
- 602 Spurgeon, J. J., Pegg, M. A., Parasiewicz, P., & Rogers, J. (2018). Diversity of river fishes  
603 influenced by heterogeneity across hydrogeomorphic divisions. *River Research and*  
604 *applications*, *34*(7), 797-806. doi: 10.1002/rra.3306
- 605 Stoeckle, M. Y., Soboleva, L. & Charlop-Powers, Z. (2017). Aquatic environmental DNA  
606 detects seasonal fish abundance and habitat preference in an urban estuary. *PLoS One*, *12*,  
607 e0175186. 10.1371/journal.pone.0175186
- 608 Strickler, K.M., Fremier, A.K., & Goldberg C.S. (2015). Quantifying effects of UV-B,  
609 temperature, and pH on eDNA degradation in aquatic microcosms. *Biological Conservation*,  
610 *183*, 85–92. doi:10.1016/j.biocon.2014.11.038
- 611 Taberlet, P., Bonin, A., Zinger, L., & Coissac, E. (2018). Environmental DNA for biodiversity  
612 research and monitoring. Oxford University Press. 253p.

- 613 Takahara, T.; Minamoto, T.; Yamanaka, H.; Doi, H.; & Kawabata, Z. (2012). Estimation of  
614 fish biomass using environmental DNA. *PLoS One*, 7(4), e35868.  
615 10.1371/journal.pone.0035868
- 616 Thomsen, F. P., & Willerslev, E. (2015). Environmental DNA – An emerging tool in  
617 conservation for monitoring past and present biodiversity. *Biological Conservation*, 183, 4-18.  
618 10.1016/j.biocon.2014.11.019
- 619 Tsuji, S., Ushio, M., Sakurai, S., Minamoto, T., & Yamanaka, H. (2017). Water temperature-  
620 dependent degradation of environmental DNA and its relation to bacterial abundance. *PLoS*  
621 *One*, 12, 4. doi: 10.1371/journal.pone.0176608
- 622 Turner, C. R., Uy, K. L., & Everhart, R. C. (2015). Fish environmental DNA is more  
623 concentrated in aquatic sediments than surface water. *Biological Conservation*, 183, 93-102.  
624 doi:10.1016/j.biocon.2014.11.017
- 625 Valdez-Moreno, M., Ivanova, N. V., Elias-Gutierrez, M., Pedersen, S. L., Bessonov, K., &  
626 Hebert, P. D. N. (2018). Using eDNA to biomonitor the fish community in a tropical  
627 oligotrophic lake. *bioRxiv*, 375089. doi:10.1101/375089.
- 628 Valentini, A., Taberlet, P., Miaud, C., Civade, R., Herder, J., Thomsen, P. F., ... Dejean, T.  
629 (2016). Next-generation monitoring of aquatic biodiversity using environmental DNA  
630 metabarcoding. *Molecular Ecology*, 25(4), 929–942. doi:10.1111/mec.13428.
- 631 Yamanaka, H., Minamoto, T., Matsuura, J., Sakurai, S., Tsuji, S., Motozawa, H., ... Kondo, A.  
632 (2017). A simple method for preserving environmental DNA in water samples at ambient  
633 temperature by addition of cationic surfactant. *Limnology*, 18(2), 233–24. doi:10.1007/s10201-  
634 016-0508-5
- 635

636 **AUTHOR CONTRIBUTIONS**

637 Study design: NGS and SM. Field work and sample collection: NGS. Laboratory experiment:  
638 NGS and OSW. Data analyses: NGS, OSW, SM. Manuscript writing: NGS, DCC, OSW, and  
639 SM.

640

641

642 **TABLES**

643

644 Table 1: Treatments analyzed according to sampling medium, preservation method used and  
645 sampling event.

| CODE | Sampling Medium | Preservation method   | Sampling event |
|------|-----------------|-----------------------|----------------|
| SED1 | Sediment        | Ethanol               | 1              |
| SED2 | Sediment        | Ethanol               | 2              |
| BAC1 | Water           | Benzalkonium chloride | 1              |
| BAC2 | Water           | Benzalkonium chloride | 2              |
| ICE1 | Water           | ICE                   | 1              |
| ICE2 | Water           | ICE                   | 2              |

646

647 Table 2: MOTUs recovery per sampling medium, preservation method, and sampling event.

648

| Sampling medium | Preservation method | Sampling event | MOTUs |
|-----------------|---------------------|----------------|-------|
| Water           | BAC                 | 1              | 194   |
|                 |                     | 2              | 71    |
|                 | ICE                 | 1              | 239   |
|                 |                     | 2              | 142   |
| Sediment        | ETHANOL             | 1              | 237   |
|                 |                     | 2              | 153   |

649

650 Table 3: PERMANOVA results ( $R^2$ -effect sizes and significance level) showing the effect of  
651 sampling medium on MOTU diversity recovery.

652

| Sampling medium | $R^2$   | Effect | Significance (p-value) |
|-----------------|---------|--------|------------------------|
| SED vs WAT      | 0.03626 | *      | 0.00099                |
| SED1 vs WAT1    | 0.07234 | *      | 0.00999                |
| SED2 vs WAT2    | 0.08183 | **     | 0.00299                |

653

654

655

656

657

658

659

660

661

662

663

664

665 **Figure 1:** Map of Jequitinhonha river basin sampling locations.

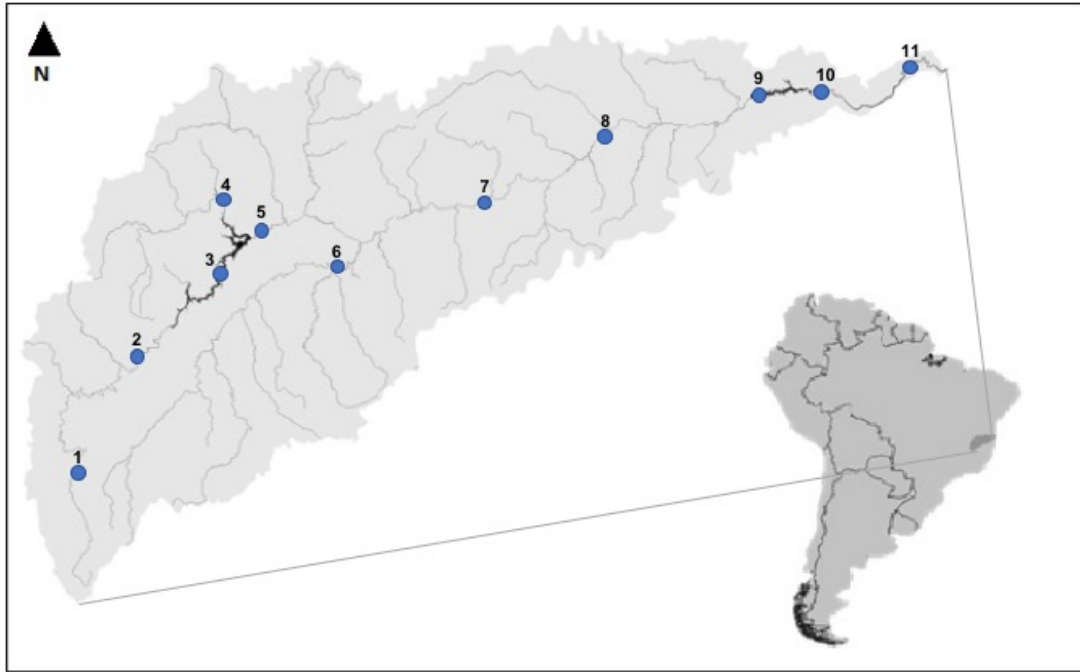

666

667 **Figure 2:** Total number of MOTUs recovered per sampling medium and preservation method  
668 (sediment vs water – BAC and ICE) and sampling event.

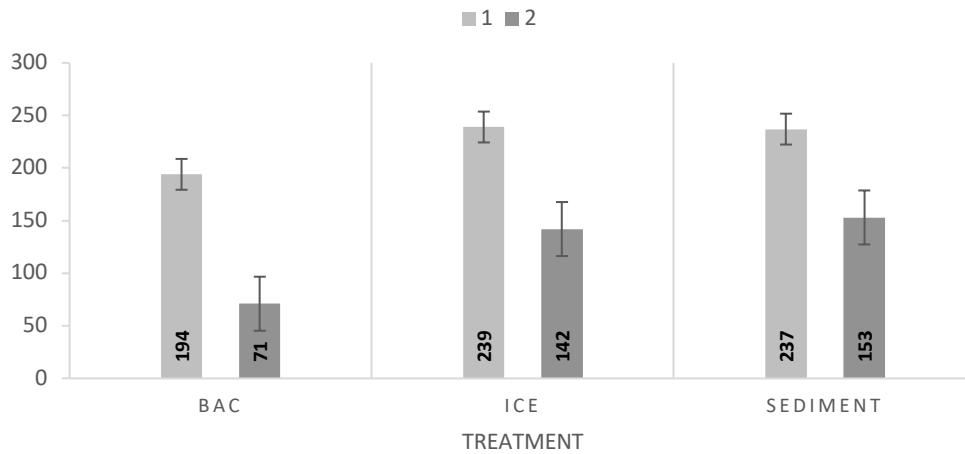

669

670

671

672

673 **Figure 3:** Non-metric multidimensional scaling (nMDS) plots showing similarities of sample sites per sampling event. Analyses based on A)  
 674 Sampling event 1; B) Sampling event 2; C) Sediment samples; D) Water samples preserved using BAC; and E) Water samples preserved using  
 675 ICE.

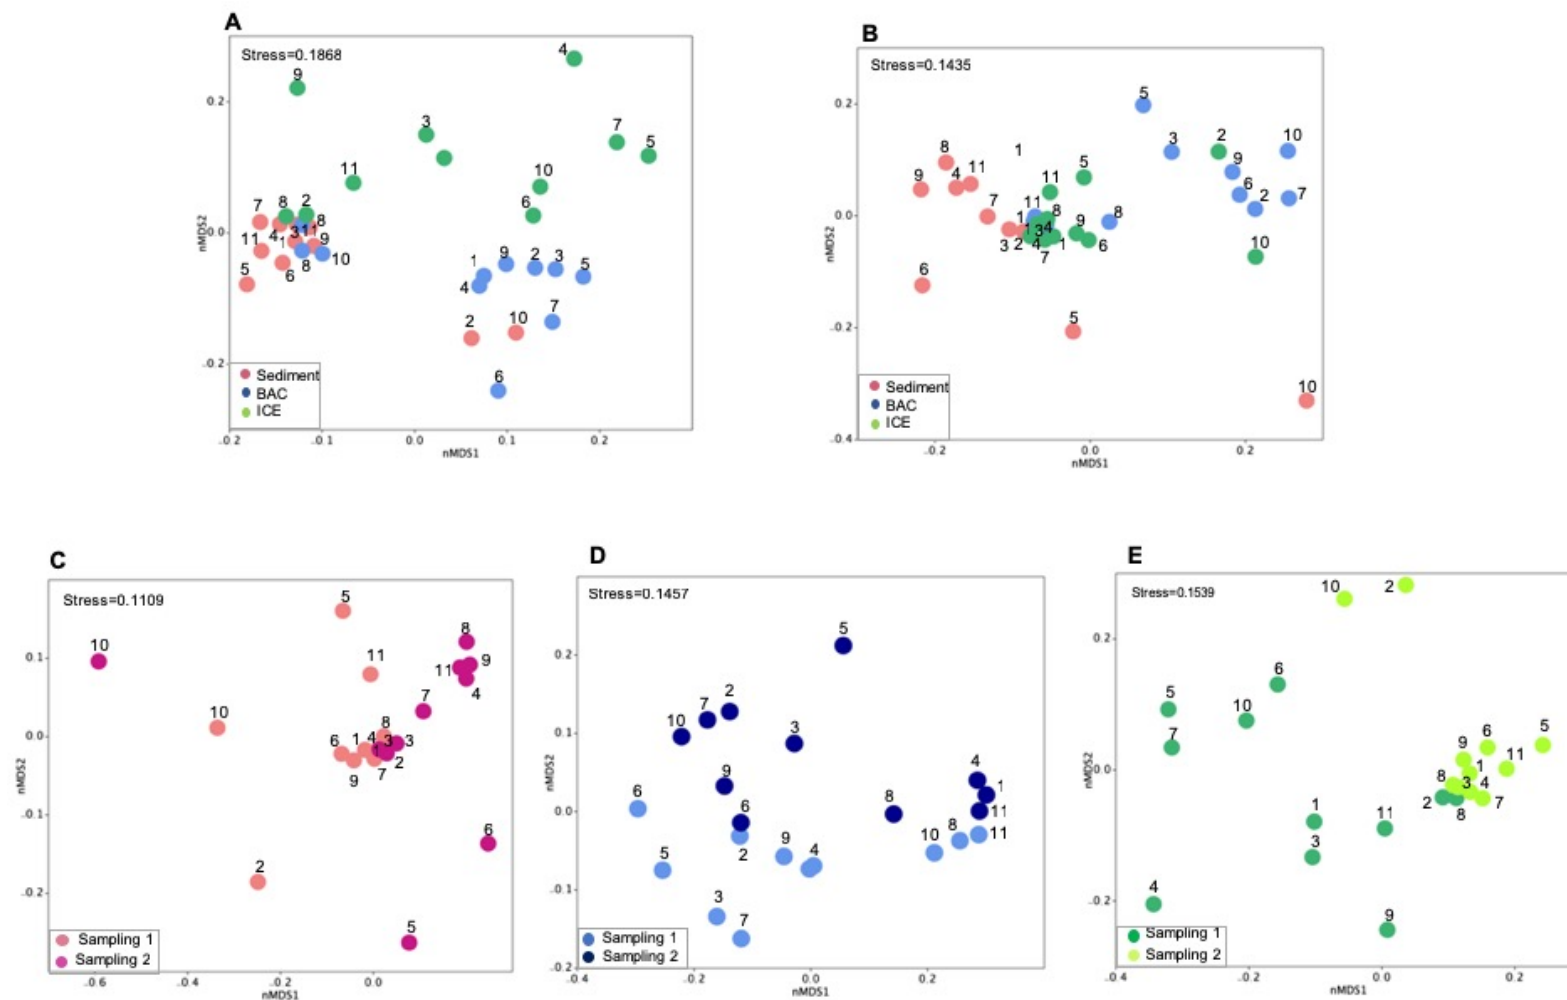

676  
677  
678  
679  
680  
681  
682  
683  
684  
685  
686  
687  
688  
689  
690

691 **Figure 4:** Comparison of MOTU recovery between sampling events.

692

693

694

695

696

697

698

699

700

701

702

703

704

705

706

707

Sampling event 1

Sampling event 2

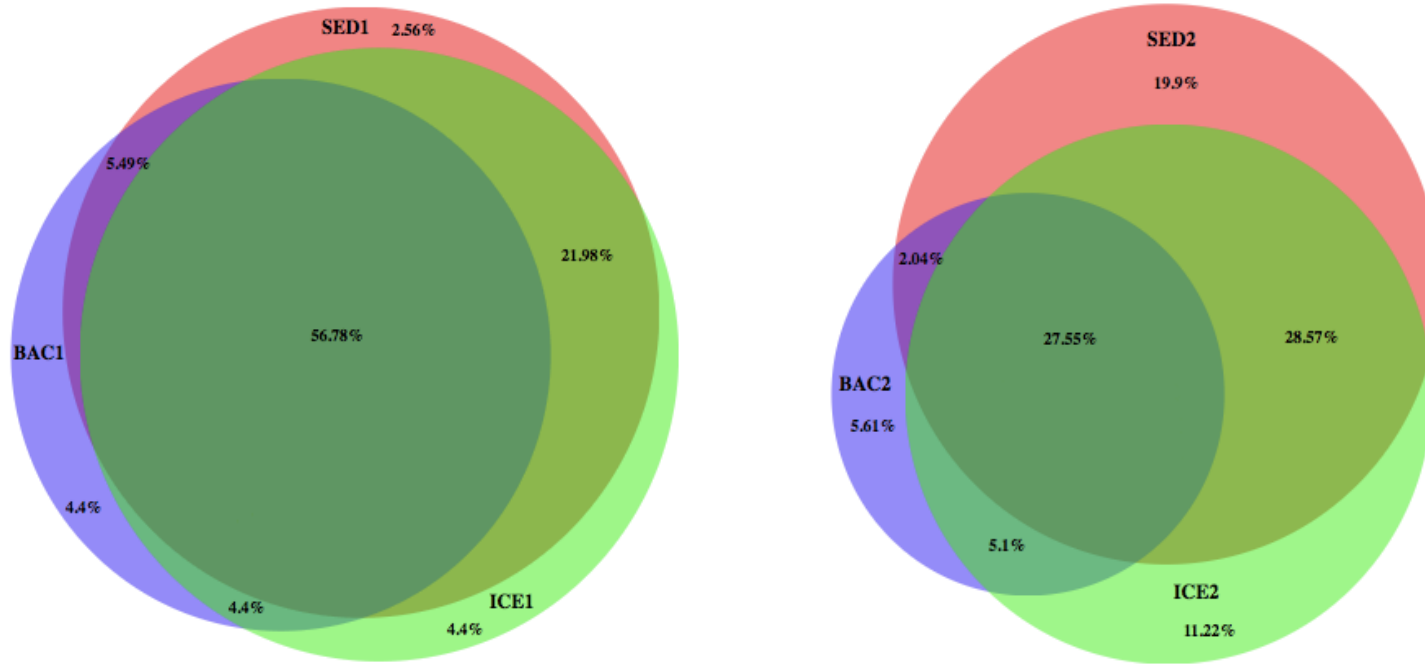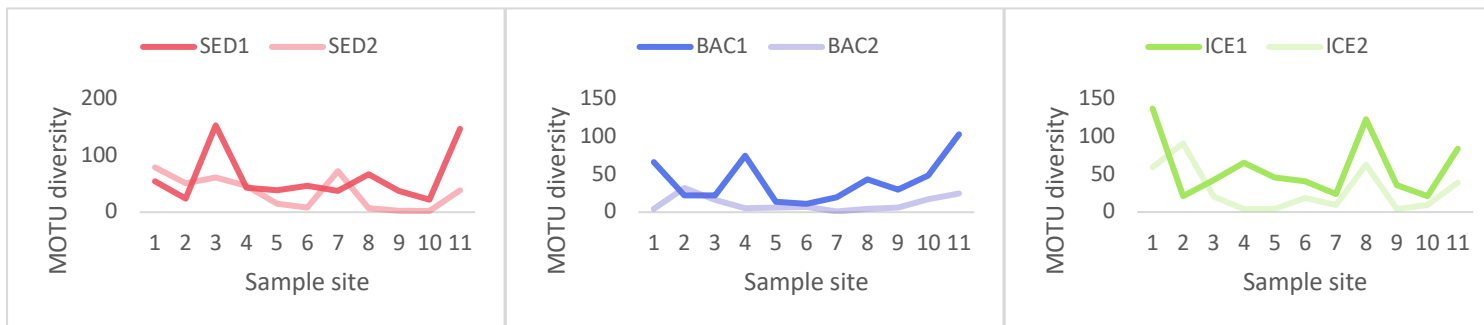

708

**Figure 5:** Relative read abundance per order and family.

709

710

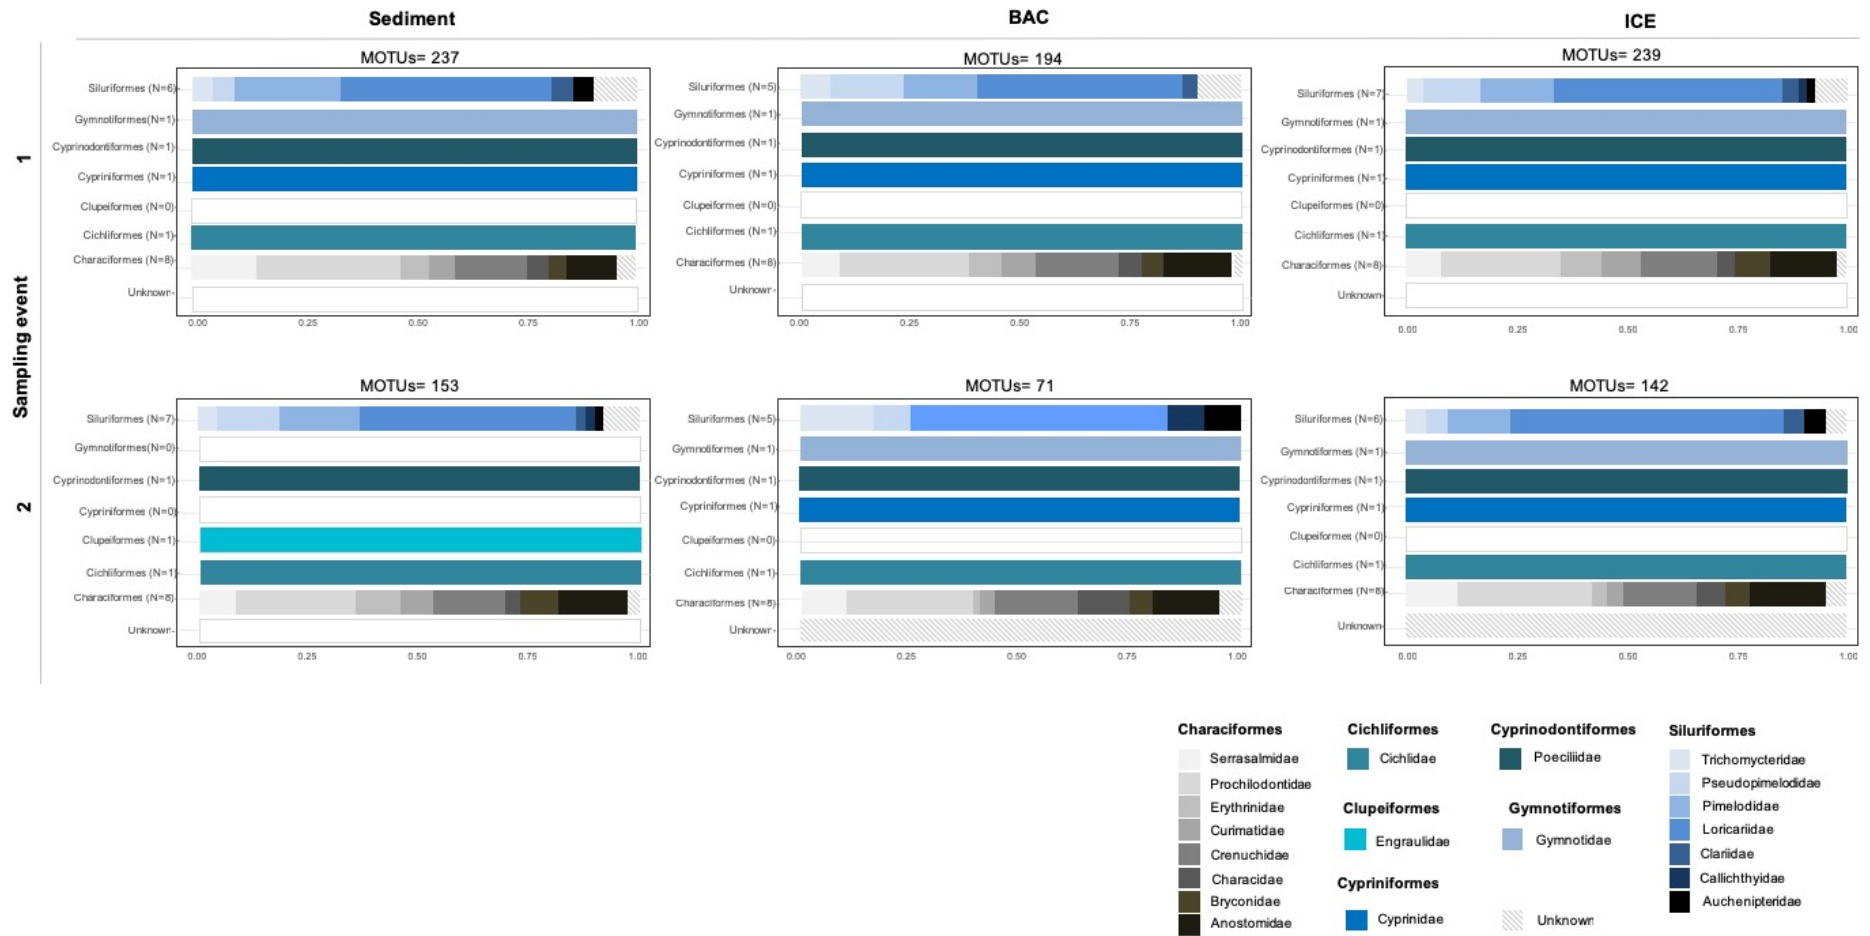

711
